# Supplementary material
Source: Springer Nature journal article supplement (https://www.springermedizin.de/resource/supplementary/12889_2007_1295_MOESM2_ESM.pdf/9502886)

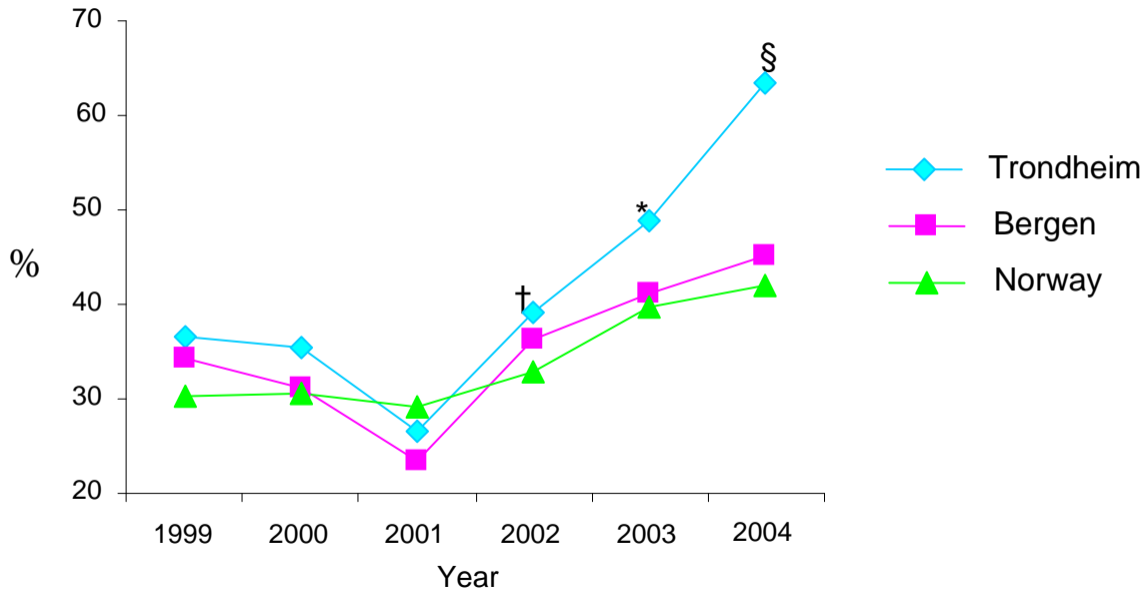

Supplement: MOESM2 [file 9502886]
